# Supplementary material
Source: MDPI journal article supplement (https://www.mdpi.com/2413-4155/4/1/14)
Supplement: s1 [file s1]

**HPLC–NMR-Based Chemical Profiling of *Matricaria pubescens* (Desf.) Schultz  
and *Matricaria recutita* and their Protective Effects on UVA-Exposed Fibroblasts**

**Supplementary Data**

|                                                                                                                                                                           |           |
|---------------------------------------------------------------------------------------------------------------------------------------------------------------------------|-----------|
| <b>Figure S1.</b> Scheme of the whole extraction protocol, analysis and biological assays.                                                                                | <b>2</b>  |
| <b>PART A: Spectra of fractions studied by a combination of NMR and HPLC-PDA-MS</b>                                                                                       | <b>3</b>  |
| <b>Subfraction ALG-CQ</b>                                                                                                                                                 | <b>3</b>  |
| <b>Figure S2.</b> HPLC-PDA MS chromatogram of fraction ALG-CQ                                                                                                             | <b>3</b>  |
| <b>Table S1.</b> MS fragmentation and UV-vis absorption data of fraction ALG-CQ                                                                                           | <b>4</b>  |
| <b>Figure S3.</b> <sup>1</sup> H-NMR spectrum (CD <sub>3</sub> OD, 500 MHz) of subfraction ALG-CQ, <i>Matricaria pubescens</i>                                            | <b>5</b>  |
| <b>Figure S4.</b> <sup>1</sup> H-NMR spectrum (CD <sub>3</sub> OD, 500 MHz)                                                                                               | <b>6</b>  |
| <b>Figure S5.</b> HSQC spectrum (CD <sub>3</sub> OD, 500 MHz).                                                                                                            | <b>7</b>  |
| <b>Figure S6.</b> COSY spectrum of subfraction Alg-CQ (CD <sub>3</sub> OD, 500 MHz)                                                                                       | <b>8</b>  |
| <b>Subfraction ALG-CL</b>                                                                                                                                                 | <b>9</b>  |
| <b>Figure S7.</b> HPLC-PDA MS chromatogram of fraction ALG-CL                                                                                                             | <b>9</b>  |
| <b>Table S2.</b> MS fragmentation and UV-vis absorption data of fraction ALG-CL                                                                                           | <b>9</b>  |
| <b>Figure S8.</b> <sup>1</sup> H-NMR spectrum (CD <sub>3</sub> OD, 500 MHz) of subfraction ALG-CL, <i>Matricaria pubescens</i> .                                          | <b>10</b> |
| <b>Figure S9.</b> HSQC spectrum (CD <sub>3</sub> OD, 500 MHz) of subfraction ALG-CL, <i>Matricaria pubescens</i>                                                          | <b>11</b> |
| <b>Subfraction ALG-CP</b>                                                                                                                                                 | <b>12</b> |
| <b>Figure S10.</b> HPLC-PDA MS chromatogram of fraction ALG-CP                                                                                                            | <b>12</b> |
| <b>Table S3.</b> MS fragmentation and UV-vis absorption data of fraction ALG-CP                                                                                           | <b>12</b> |
| <b>Figure S11.</b> <sup>1</sup> H-NMR spectrum (CD <sub>3</sub> OD, 500 MHz) of subfraction ALG-CP, <i>Matricaria pubescens</i>                                           | <b>14</b> |
| <b>Figure S12.</b> HMBC spectrum (CD <sub>3</sub> OD, 500 MHz) of subfraction ALG-CP, <i>Matricaria pubescens</i>                                                         | <b>15</b> |
| <b>PART B: HPLC-PDA-MS Chromatograms and Tables of identification of extracts of <i>M. pubescens</i> and <i>M. recutita</i> by HPLC-PDA-MS</b>                            | <b>16</b> |
| <b>Figure S13.</b> HPLC-PDA-MS chromatogram of the MeOH 50% extract of <i>Matricaria pubescens</i> flowers.                                                               | <b>16</b> |
| <b>Table S4.</b> MS fragmentation and UV-vis absorption data of the compounds detected in the MeOH:H <sub>2</sub> O 50:50 extract of <i>Matricaria pubescens</i> flowers. | <b>17</b> |
| <b>Figure S14.</b> HPLC-PDA-MS chromatogram of the Butanol extract of <i>Matricaria pubescens</i> flowers.                                                                | <b>19</b> |
| <b>Table S5.</b> MS fragmentation and UV-vis absorption data of the compounds detected in the butanol extract of <i>Matricaria pubescens</i> flowers.                     | <b>20</b> |
| <b>Figure S15.</b> HPLC-PDA-MS chromatogram of the MeOH 50% extract of <i>Matricaria recutita</i> flowers.                                                                | <b>22</b> |
| <b>Table S6.</b> MS fragmentation and UV-vis absorption data of the compounds detected in the MeOH:H <sub>2</sub> O extract of <i>Matricaria recutita</i> flowers.        | <b>23</b> |
| <b>In vitro protective activity on BALbC 3T3 mouse skin fibroblasts</b>                                                                                                   | <b>25</b> |

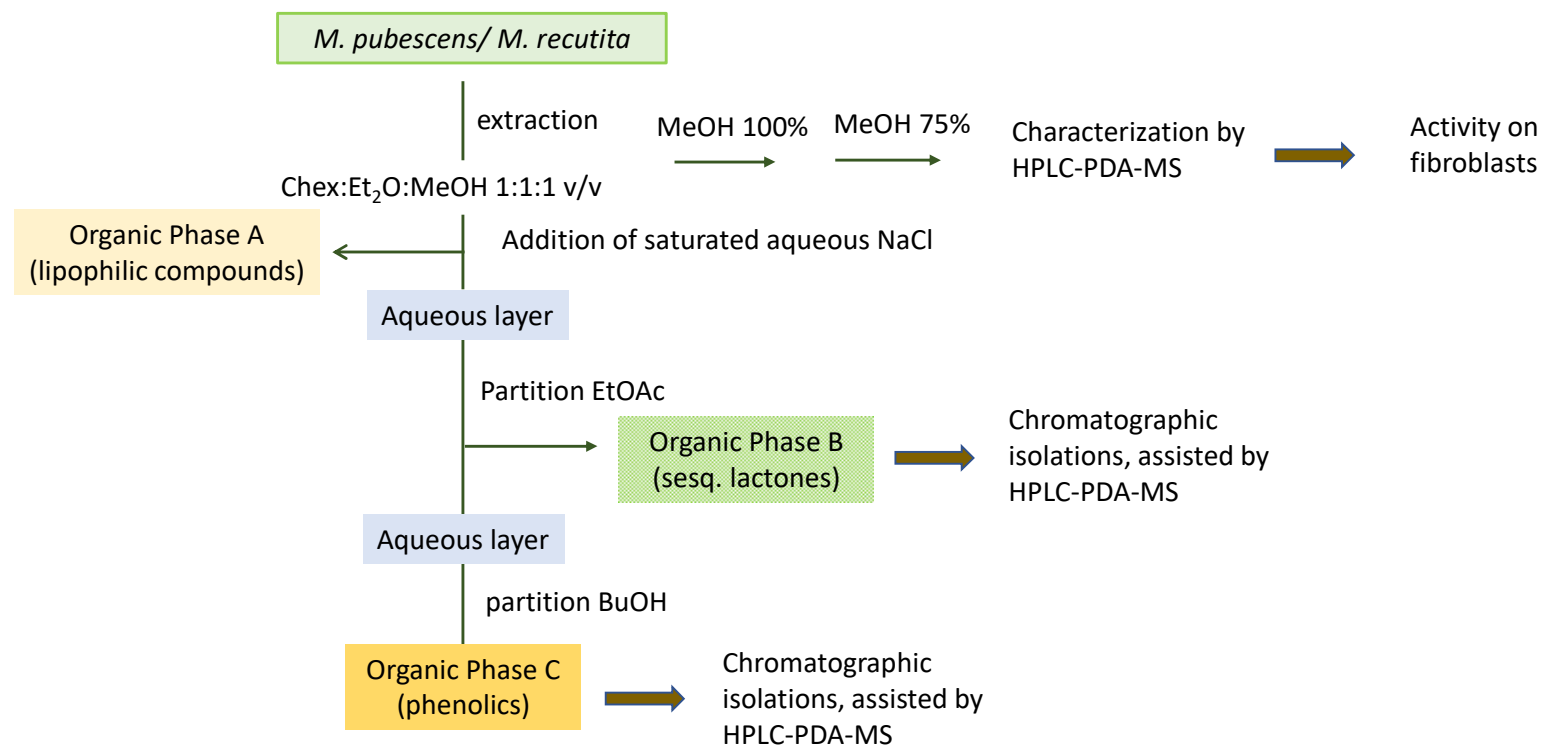

**Figure S1.** Scheme of the whole extraction protocol, analysis and biological assays. The extraction protocol with cyclohexane:diethylether:methanol 1:1:1 was described by Zdero and Bohlmann [Zdero, C.; Bohlmann, F. Sesquiterpene lactones and other terpenes from *Geigeria* species. *Phytochemistry* **1989**, 28, 3105-3120.]

## PART A: Spectra of fractions studied by a combination of NMR and HPLC-PDA-MS

### Subfraction ALG-CQ

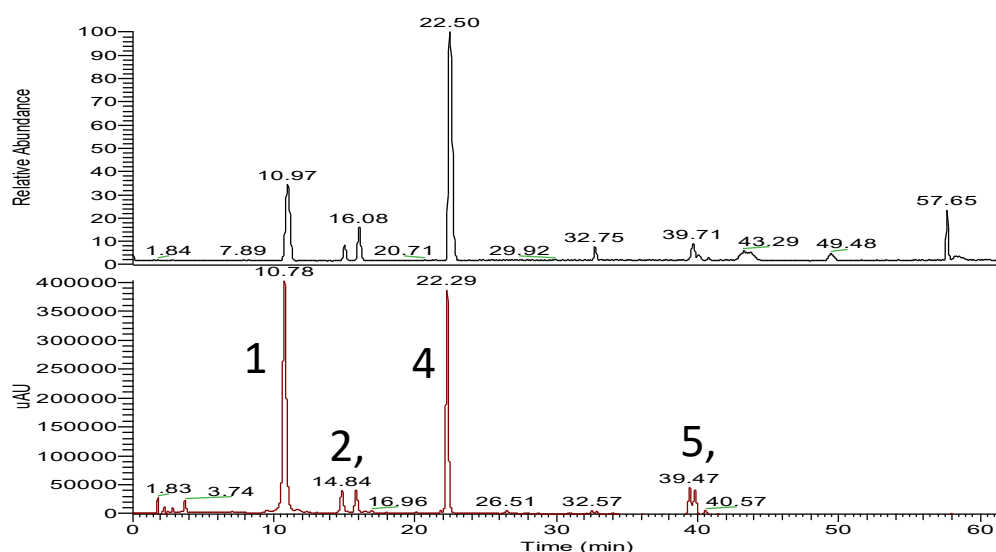

**Figure S2.** HPLC-PDA MS chromatogram of fraction ALG-CQ

HPLC-PDA-MS chromatogram of **subfraction ALG-CQ** exhibited two main peaks (**Fig. S2**), one of which belonged to the previously isolated luteolin-4'-O-glucoside (**13**). Furthermore, apigenin and hispidulin were detected in small amounts. Subtraction of the signals of **13** from  $^1\text{H-NMR}$ , COSY and HSQC spectra, showed unambiguous signals of an ABX aromatic system belonging to a flavonol (259, 274sh, 356nm) bearing only one proton at  $\delta$  6.90 ( $\delta_c$  95.6). From the chemical shifts it is attributed to H-8 of the flavonol moiety, therefore the peak was attributed to a quercetagenin skeleton. HSQC-TOCSY spectra of the mixture confirmed the presence of a glucopyranose group which was placed on position 3 based on the HMBC (H-1''/C-3) and UV data (356 nm). Therefore, the compound was identified as quercetagenin-3-O-glucopyranoside and is detected for the first time in *Matricaria* spp. Its NMR data are also described here for the first time. Two minor peaks in the HPLC-PDA-MS chromatogram were identified as quercetin-7-O-glucoside (**6**) and 6-hydroxykaempferol-3-hexoside (**24**). Comparison of the retention time, UV and MS data of quercetin-7-O-glucoside and quercetin-3-O-glucoside, confirmed the identity of compound **6**, whereas compound **24** has been reported several times in plants of the Asteraceae family [1-2]. Finally, in the  $^1\text{H-NMR}$  and COSY spectra a remaining AA'BB' system was evident at low fields at  $\delta$  8.1/132 ppm, indicating a flavonol unit. Indeed, in the HPLC-PDA-MS chromatogram a minor peak with maxima 274 and 346nm, suggested the

presence of a 3-O-substituted flavonol and especially a kaempferol moiety. From the fragment at  $m/z = 300.9$  an oxygenated kaempferol derivative was suggested, while the UV absorption at 274nm indicated that the hydroxylation site was carbon 6. The placement of the sugar moiety on position 3 explains the hypsochromic shift at 346 nm, observable for kaempferol derivatives [3]. In the case of a quercetin derivative absorption maxima at ~354nm would have been observed [3].

#### References

- [1] Bhavé A.; Schulzová, V.; Mrnka, L.; Hajšlová, J. Influence of Harvest Date and Postharvest Treatment on Carotenoid and Flavonoid Composition in French Marigold Flowers. *Journal of Agricultural and Food Chemistry* **2020** 68, 7880-7889.
- [2] Gong, Y.; Liu, X.; He, WH.; Xu, HG.; Yuan, F.; Gao, YX. Investigation into the antioxidant activity and chemical composition of alcoholic extracts from defatted marigold (*Tagetes erecta* L.) residue. *Fitoterapia* 2012, 83, 481-489.
- [3] Mabry, T.J.; Markham, K.R.; Thomas, M.B. The Ultraviolet Spectra of Flavones and Flavonols. In *The Systematic Identification of Flavonoids*, Mabry, T.J., Markham, K.R., Thomas, M.B., Eds.: Springer, Berlin, Heidelberg, 1970; pp.41-164.

**Table T1.** MS fragmentation and UV-vis absorption data of fraction ALG-CQ

|          | <b>Rt (min)</b> | <b>UV</b>       | <b>ESI-MS(-)</b>                                    | <b>Identification</b>             |
|----------|-----------------|-----------------|-----------------------------------------------------|-----------------------------------|
| <b>1</b> | 10.8            | 259, 274sh, 356 | 316.9 [A-H] <sup>-</sup> , 478.9 [M-H] <sup>-</sup> | quercetagenin-3-O-glucopyranoside |
| <b>2</b> | 14.8            | 255, 370        | 300.9[A-H] <sup>-</sup> , 462.8 [M-H] <sup>-</sup>  | quercetin-7-O-glucopyranoside     |
| <b>3</b> | 15.8            | 257sh, 274, 345 | 300.9 [A-H] <sup>-</sup> , 462.9 [M-H] <sup>-</sup> | 6-hydroxykaempferol-3-hexoside    |
| <b>4</b> | 22.3            | 248sh, 268, 338 | 284.9 [A-H] <sup>-</sup> , 447.1 [M-H] <sup>-</sup> | luteolin -4'-O-glucoside          |
| <b>5</b> | 39.5            | 267, 336        | 268.9 [M-H] <sup>-</sup>                            | apigenin                          |
| <b>6</b> | 39.8            | 273, 334        | 283.9, 298.8 [M-H] <sup>-</sup>                     | hispidulin                        |

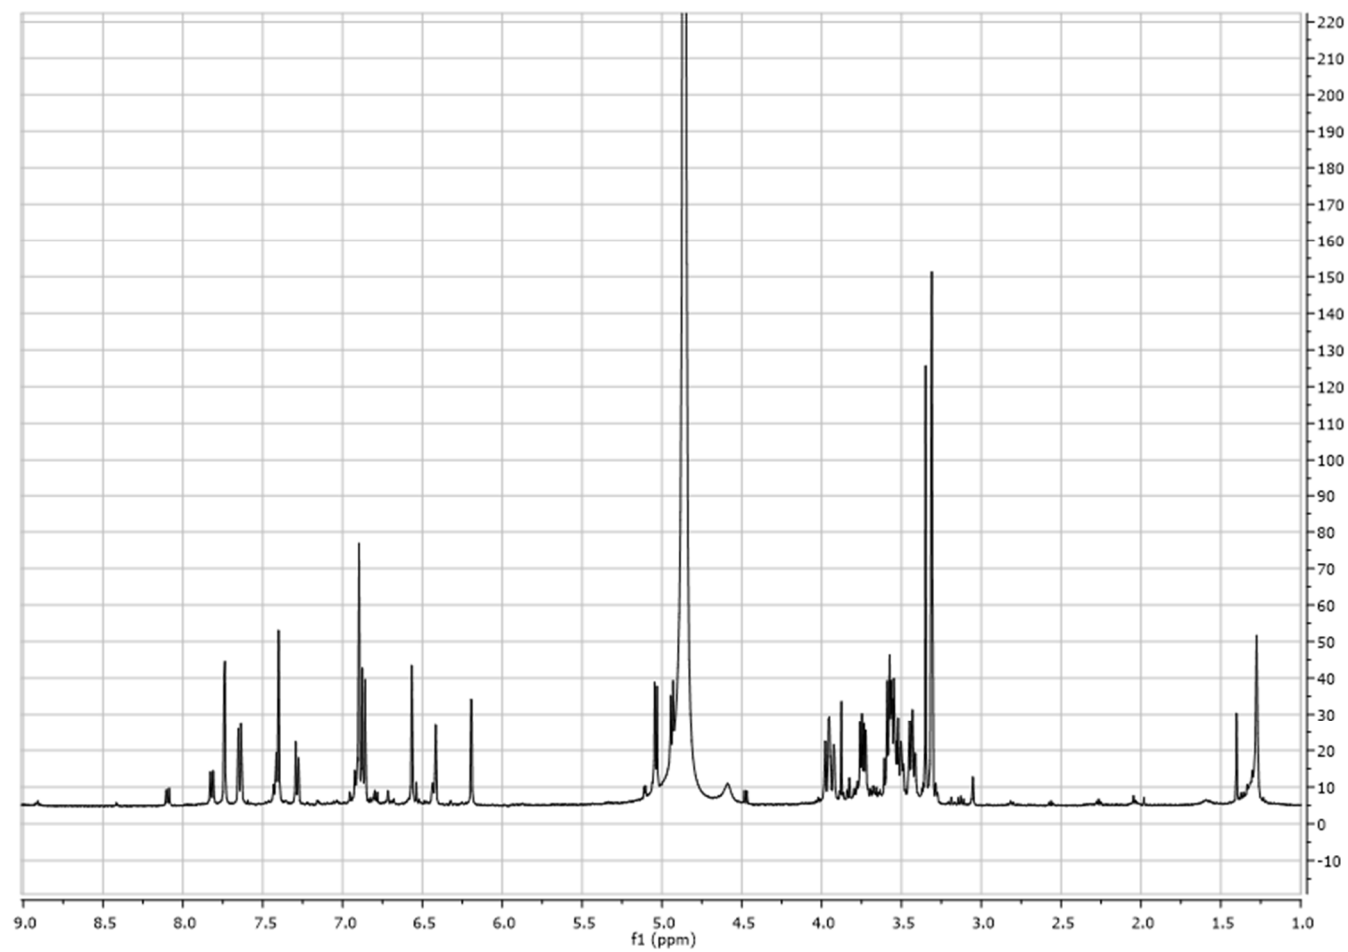

**Figure S3.** <sup>1</sup>H-NMR spectrum (CD<sub>3</sub>OD, 500 MHz) of subfraction ALG-CQ, *Matricaria pubescens*: mixture of luteolin-4'-glucopyranoside and quercetagenin-3-O-glucopyranoside

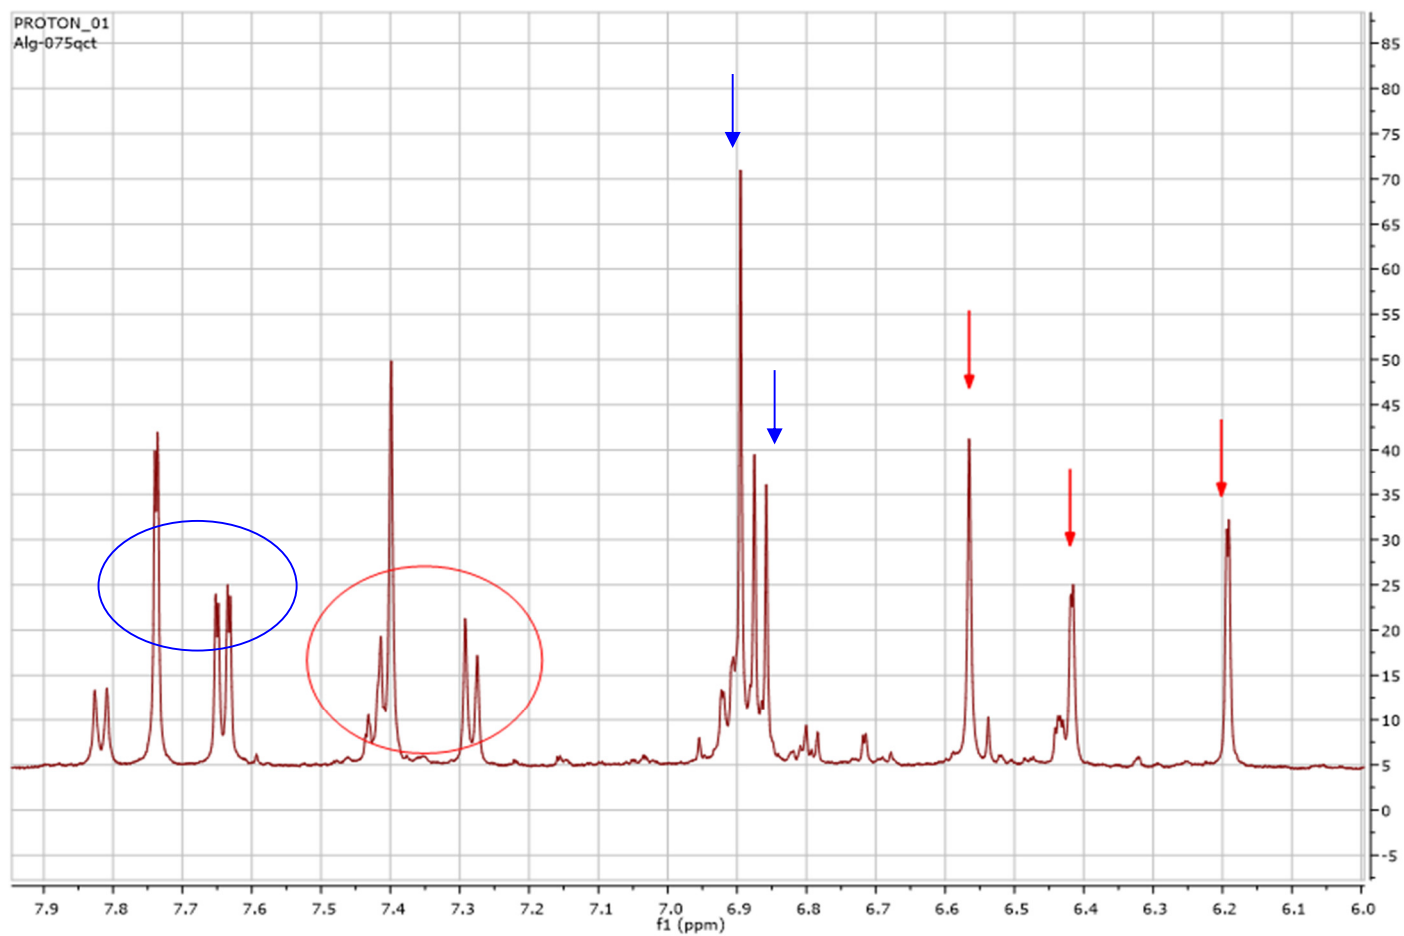

**Figure S4.**  $^1\text{H}$ -NMR spectrum ( $\text{CD}_3\text{OD}$ , 500 MHz): in the aromatic area the characteristic signals of luteolin-4'-glucopyranoside (in red) and quercetagenin-3-O-glucopyranoside (in blue) can be observed

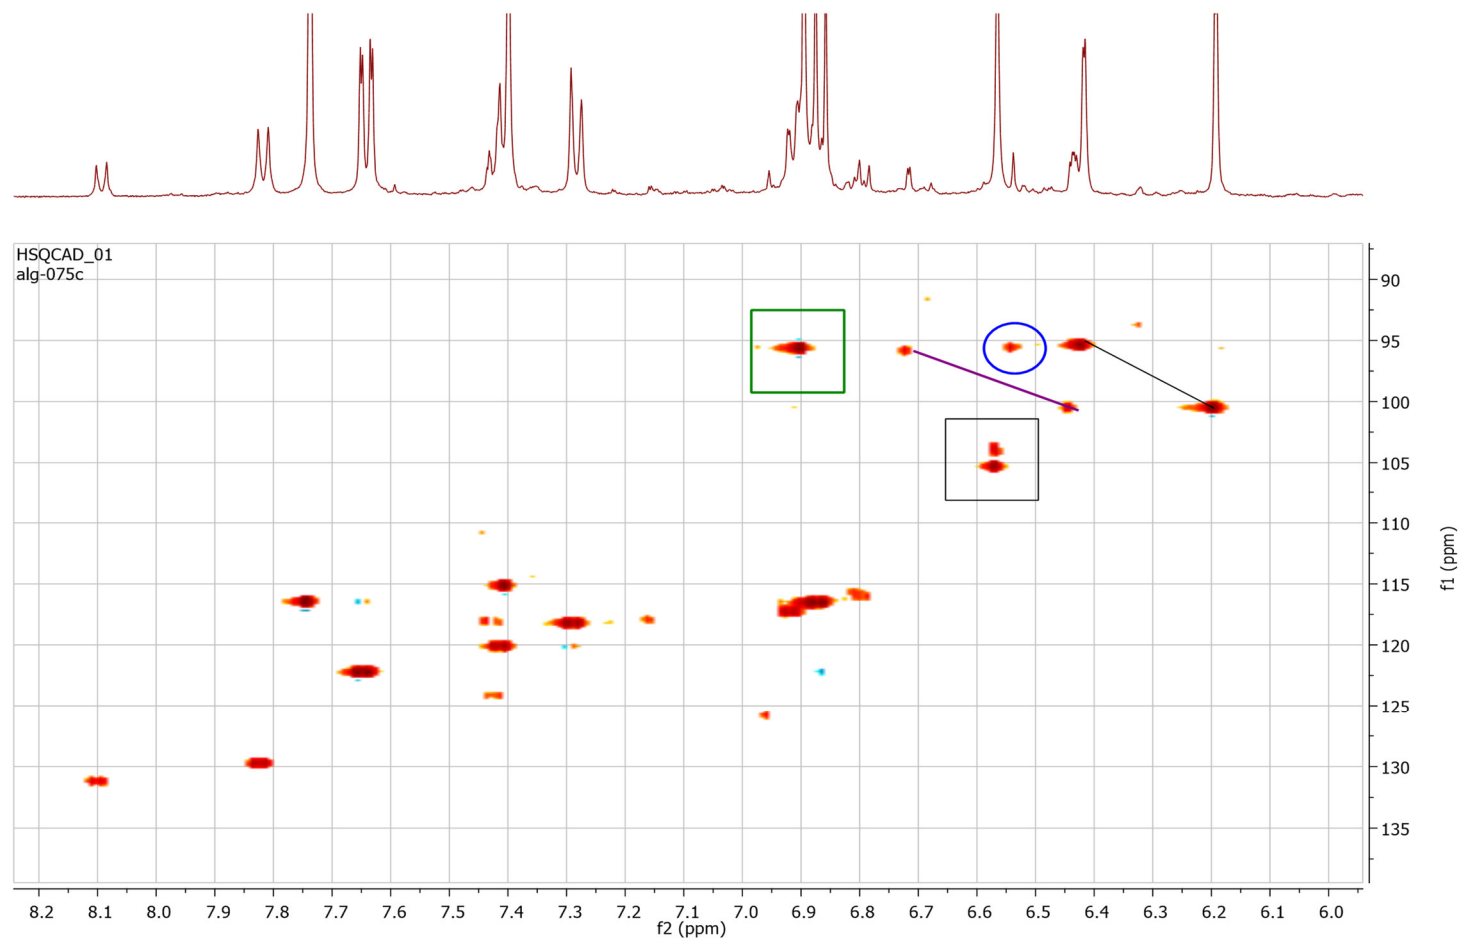

**Figure S5.** HSQC spectrum ( $\text{CD}_3\text{OD}$ , 500 MHz): in green color H8 of quercetagenin-3-O-glucopyranoside is indicated, in blue H8 of hispidulin, in black H3 luteolin-4'-glucopyranoside along with H3 of the aglycons (apigenin and hispidulin) and in violet H8 and H6 of quercetin-7-O-glucoside. The signals of deshielded protons at  $\sim 8.1/132$  ppm are attributed to protons H-2''/H-6'' (AA'BB' system) of the 6-hydroxy-kaempferol-3-O-glucoside.

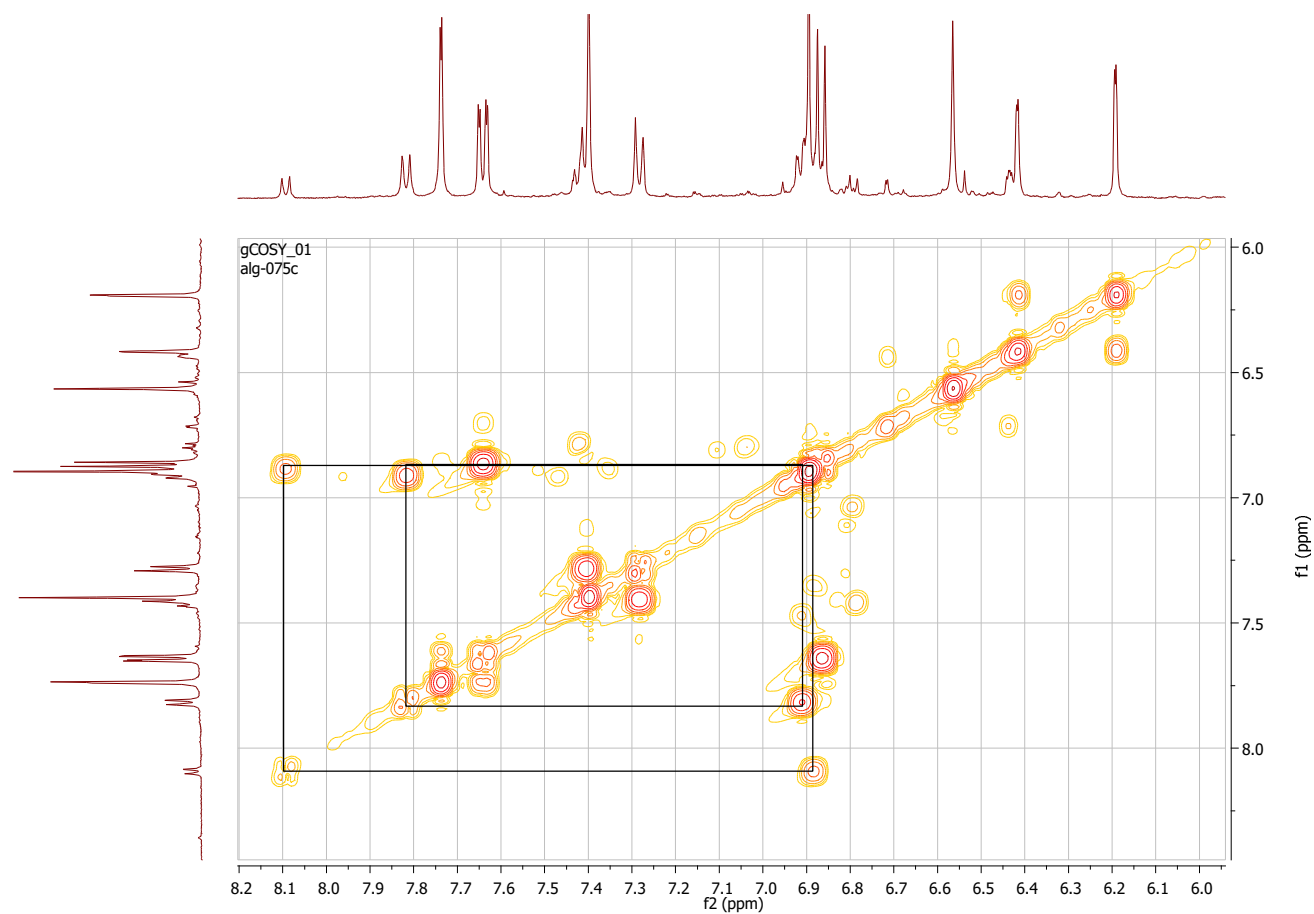

**Figure S6.** COSY spectrum of subfraction Alg-CQ ( $\text{CD}_3\text{OD}$ , 500 MHz): the two AA'BB' systems of apigenin and 6-hydroxykaempferol-3-O-glucoside are observed.



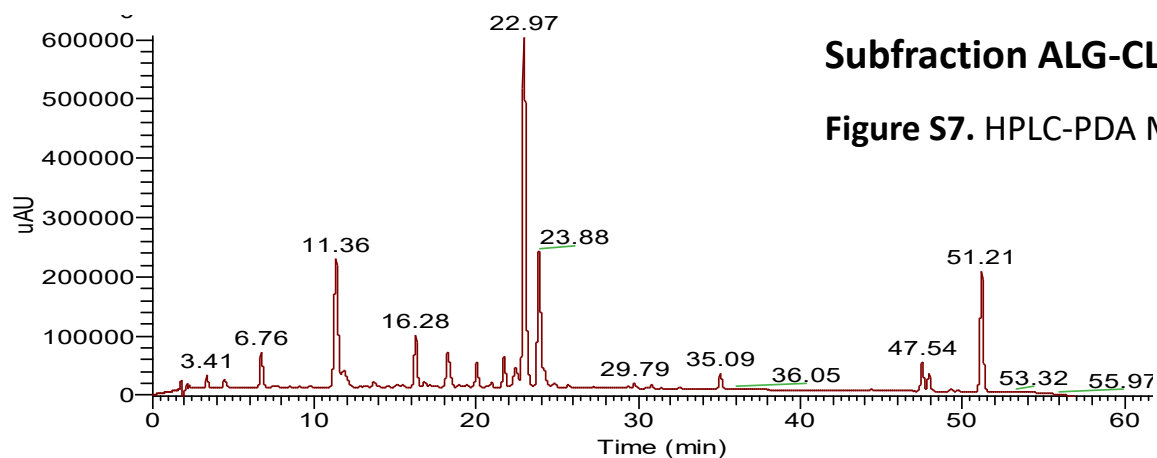

|          | Rt (min)     | UV                     | ESI-MS(-)                                                                                       | Identification                                                                |
|----------|--------------|------------------------|-------------------------------------------------------------------------------------------------|-------------------------------------------------------------------------------|
| <b>1</b> | <b>11.36</b> | <b>256sh, 269, 349</b> | <b>327.0 [M-120-H]<sup>-</sup>, 357.1 [M-90-H]<sup>-</sup>, 447.1 [M-H]<sup>-</sup></b>         | <b>luteolin-6-C-glucopyranoside</b>                                           |
| <b>2</b> | 16.28        | 270, 337               | 283.0, 310.9 [M-120-H] <sup>-</sup> , 340.9 [M-90-H] <sup>-</sup> , 431.0 [M-H] <sup>-</sup>    | Apigenin-7-C-glucoside                                                        |
| <b>3</b> | 18.2         | 282, 334               | 284.0 [A-2H] <sup>-</sup> , 447.1 [M-H] <sup>-</sup>                                            | 6-hydroxyapigenin-7-hexoside or scutellarein-7-O-hexoside (Ravn et al., 1990) |
| <b>4</b> | 20.1         | 256, 271, 344          | 298.9 [A-CH <sub>3</sub> -H] <sup>-</sup> , 315.0 [A-H] <sup>-</sup> , 477.0 [M-H] <sup>-</sup> | 6-methoxykaempferol-3-hexoside, tentatively                                   |
| <b>5</b> | 21.94        | 254, 266, 350          | 314.0 [A-2H] <sup>-</sup> , 477.0 [M-H] <sup>-</sup>                                            | isorhamnetin-3-hexoside                                                       |
| <b>6</b> | <b>22.97</b> | <b>267, 333</b>        | <b>268.9 [A-H]<sup>-</sup>, 431.1 [M-H]<sup>-</sup></b>                                         | <b>apigenin-7-O-glucoside</b>                                                 |
| <b>7</b> | 23.88        | 267, 336               | 269.0 [A-H] <sup>-</sup> , 445.0 [M-H] <sup>-</sup>                                             | apigenin-7-O-glucuronide                                                      |
| <b>8</b> | 35.09        | 267, 337               | 268.0 [A-2H] <sup>-</sup> , 473.0 [M-H] <sup>-</sup>                                            | apigenin-7-O-acetylhexoside                                                   |
| <b>9</b> | 51.21        | 298, 308               | 785 [M-H] <sup>-</sup>                                                                          | Acylated spermine derivative                                                  |

## Subfraction ALG-CL

**Table T2.** MS fragmentation and Uv-vis absorption data of fraction ALG-CL

**ALG-CL** was analyzed in a similar manner. Apart from apigenin-7-O-glucopyranoside which was easily confirmed by a reference standard, luteolin-6-C-glucopyranoside (isoorientin) (**3**) was identified by 2D NMR spectra. The anomeric carbon at  $\delta_C$  75.4 was diagnostic of a C-heteroside, while the remaining protonated carbon at  $\delta_C$  95.3 (C-8) suggested that 6 was the glycosylation site. An HSQC-TOCSY proved the beta glucose moiety.

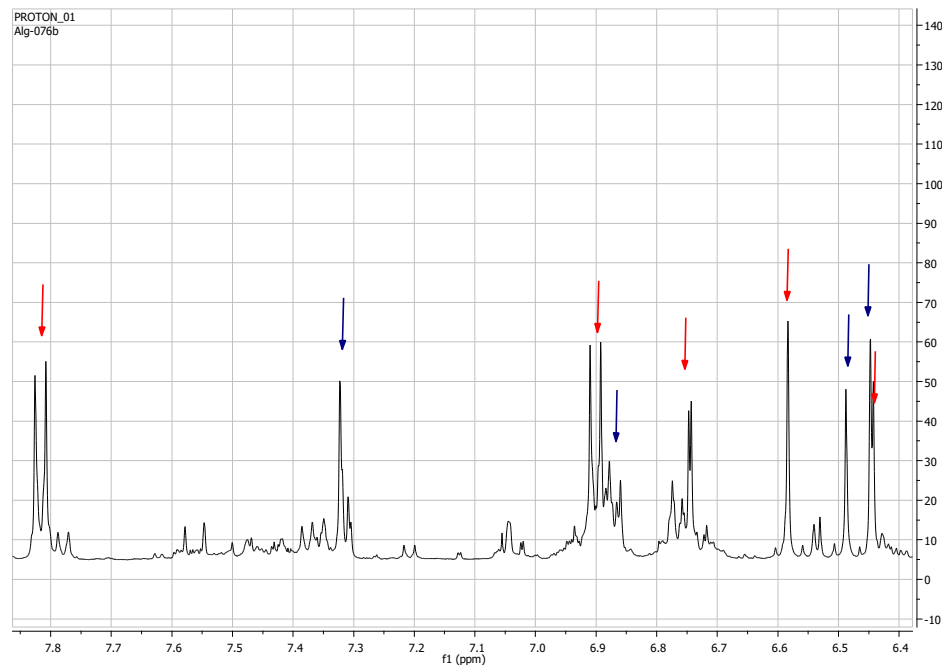

**Figure S8.**  $^1\text{H}$ -NMR spectrum ( $\text{CD}_3\text{OD}$ , 500 MHz) of subfraction ALG-CL, *Matricaria pubescens*: mixture of apigenin-7-O-glucopyranoside in red color (AA'BB') and luteolin-6-C-glucopyranoside, in blue color (ABX system).

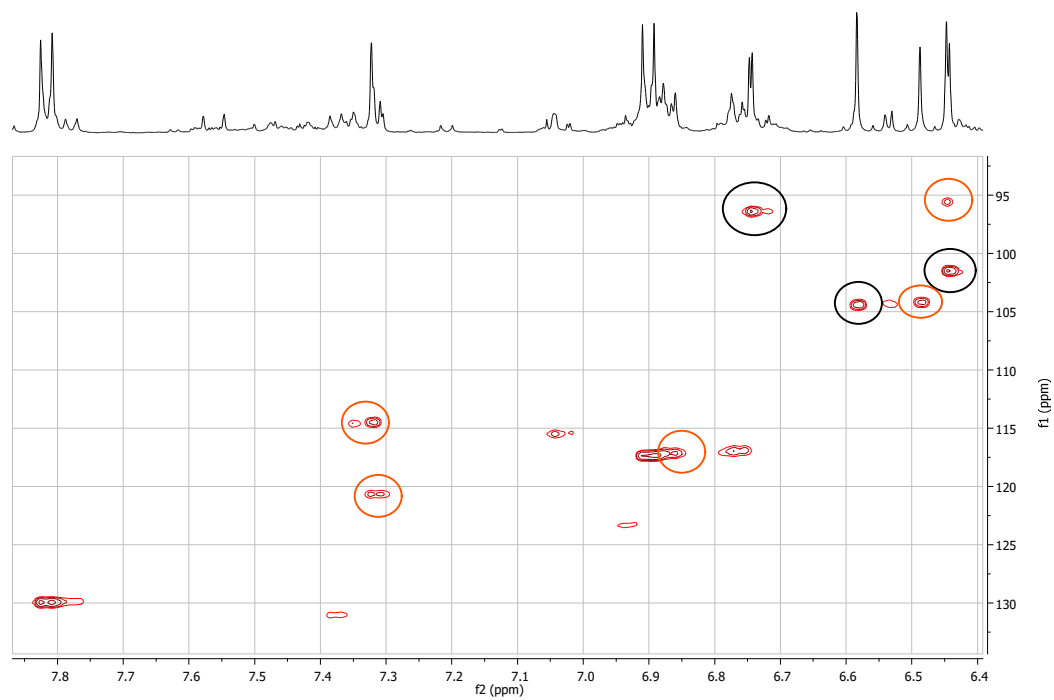

**Figure S9.** HSQC spectrum (CD<sub>3</sub>OD, 500 MHz) of subfraction ALG-CL, *Matricaria pubescens*, containing apigenin-7-O-glucopyranoside (in black color) and luteolin-6-C-glucopyranoside (in red color).

## Subfraction ALG-CP

**Figure S10.** HPLC-PDA MS chromatogram of fraction ALG-CP

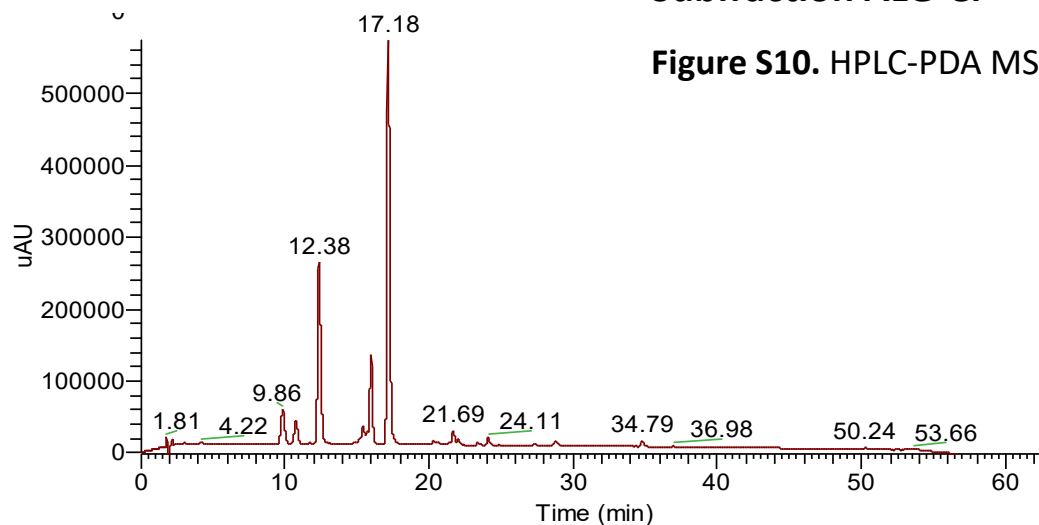

**Table T3.** MS fragmentation and UV-vis absorption data of fraction ALG-CP

|          | Rt (min) | UV                 | ESI-MS(-)                                           | Identification                  |
|----------|----------|--------------------|-----------------------------------------------------|---------------------------------|
| <b>1</b> | 12.4     | 281, 344           | 300.9 [A-H] <sup>-</sup> , 463.0 [M-H] <sup>-</sup> | 6-hydroxyluteolin-7-O-glucoside |
| <b>2</b> | 17.2     | 254,<br>263sh, 348 | 284.9 [A-H] <sup>-</sup> , 447.1[M-H] <sup>-</sup>  | luteolin-7-O-glucoside          |

Finally, ALG-CP contained luteolin-7-O-glucopyranoside (**10**), confirmed by both NMR and a reference standard, whereas the remaining signals in the NMR spectra were attributed to 6-hydroxyluteolin-7-O-glucopyranoside (**5**). Diagnostic signals for compound **5**, were the ABX system along with two single protons which resonated at  $\delta$  6.96 ( $\delta_C$  at 95.7, C-8) and at  $\delta$  6.53 ( $\delta_C$  at 103.8, C-3) while an extra oxygenated carbon at  $\delta_C$  132.1

was attributed to C-6. All UV, MS and retention time data were in accordance with this hypothesis. The presence of 6-hydroxyluteolin-7-O-glucopyranoside is considered characteristic of the European chamomile *M. recutita* [4].

[4] Greger, H. Laubblatt-Flavonoide und Systematik bei *Matricaria* und *Tripleurospermum* (*Asteraceae-Anthemideae*). *Pl Syst Evol* **1975**, *124*, 35–55.

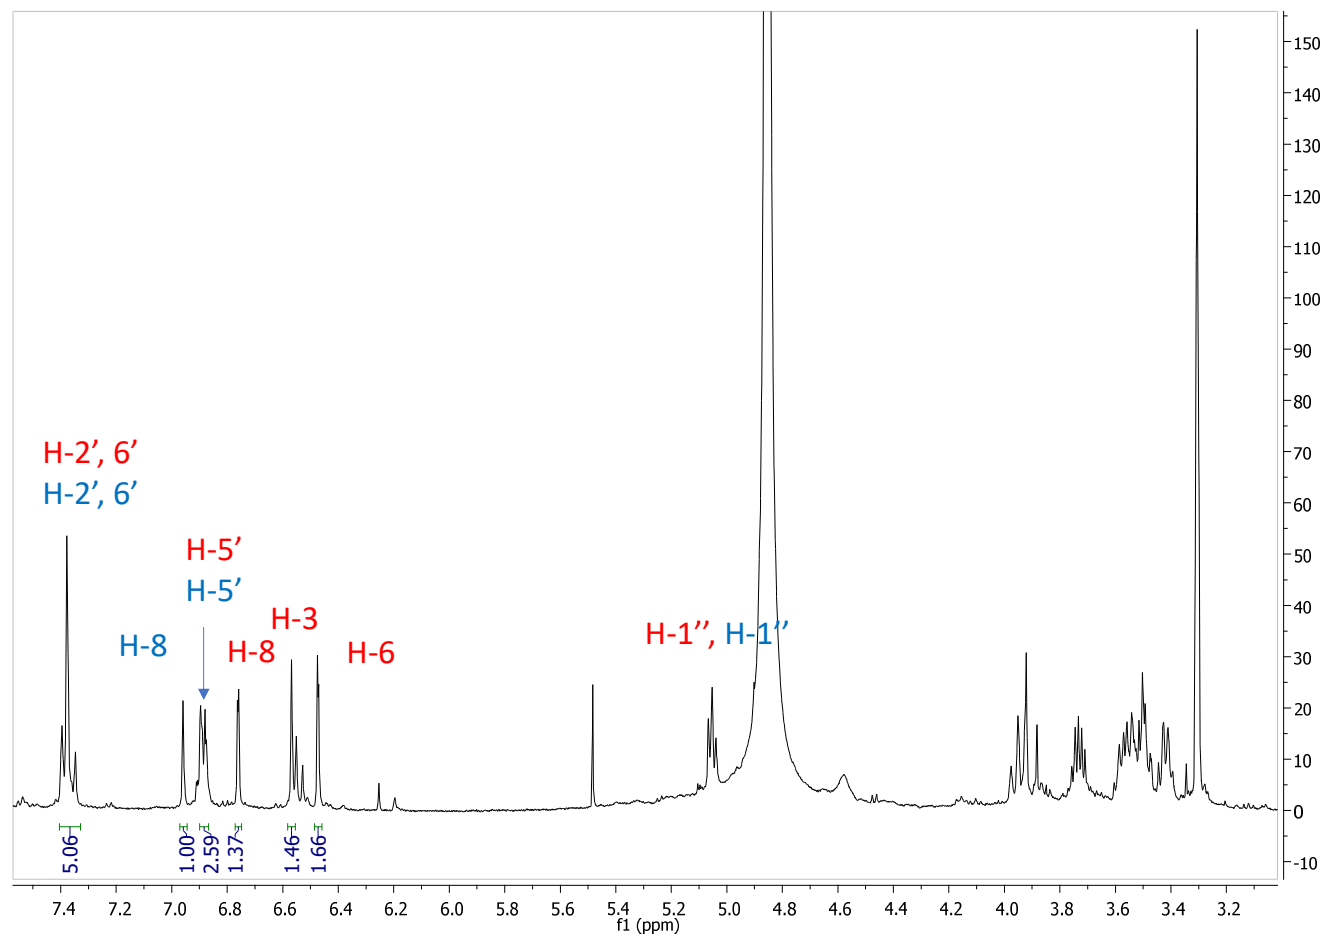

**Figure S11.**  $^1\text{H}$ -NMR spectrum ( $\text{CD}_3\text{OD}$ , 500 MHz) of subfraction ALG-CP, *Matricaria pubescens*: mixture of luteolin-7-O-glucopyranoside (in red color and 6-hydroxyluteolin-7-O-glucopyranoside, in blue color).

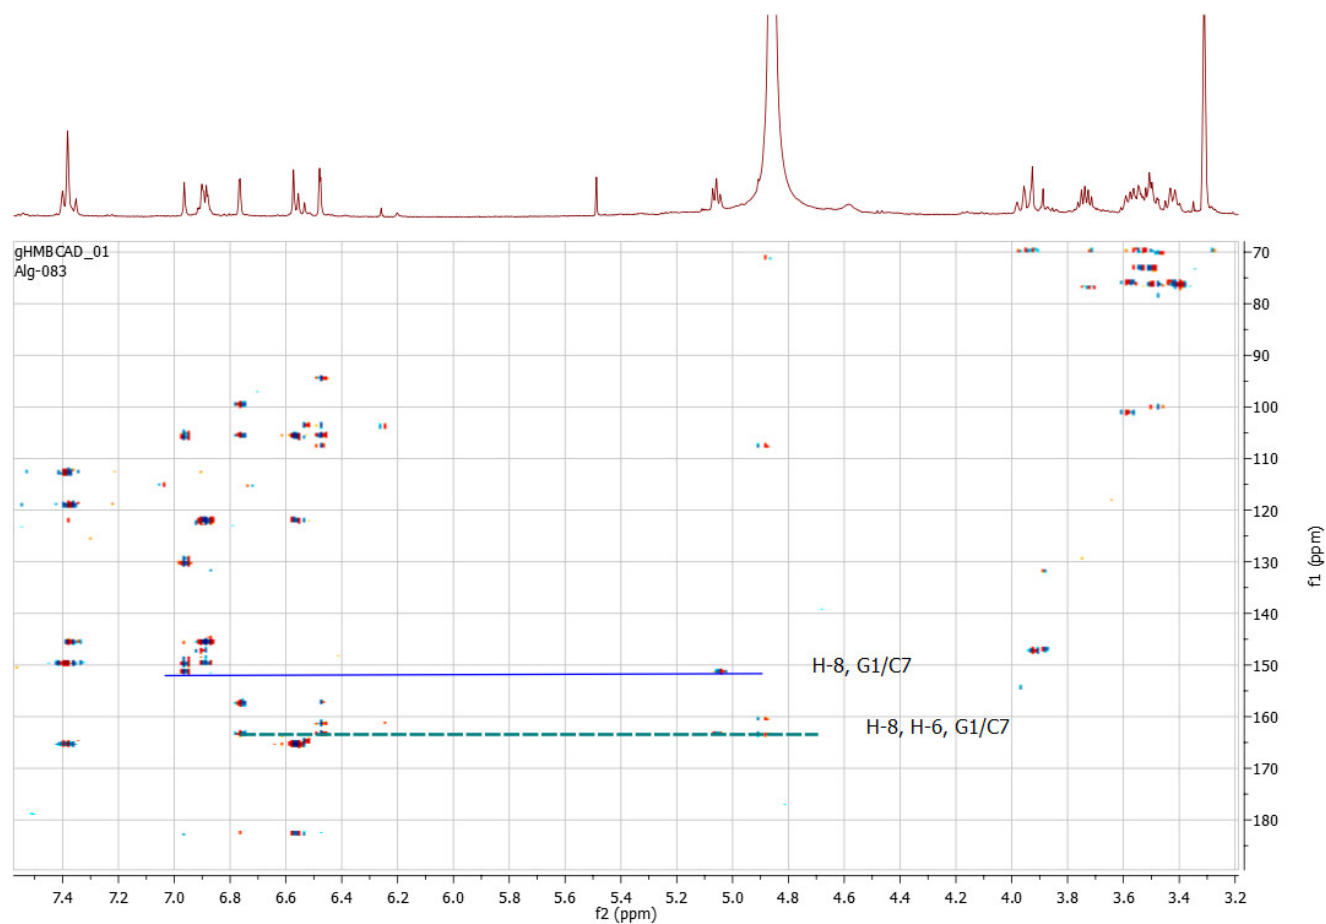

**Figure S12.** HMBC spectrum (CD<sub>3</sub>OD, 500 MHz) of subfraction ALG-CP, *Matricaria pubescens*: crosspeaks of H-8, G1/C-7 of 6-hydroxyluteolin-7-O-glucopyranoside (in blue color) and crosspeaks between H-8, H-6, G1/C-7 of luteolin-7-O-glucopyranoside, in green color.

## PART B: HPLC-PDA-MS Chromatograms and Tables of identification of extracts of *M. pubescens* and *M. recutita* by HPLC-PDA-MS

RT: 0.00 - 50.00 SM: 7G

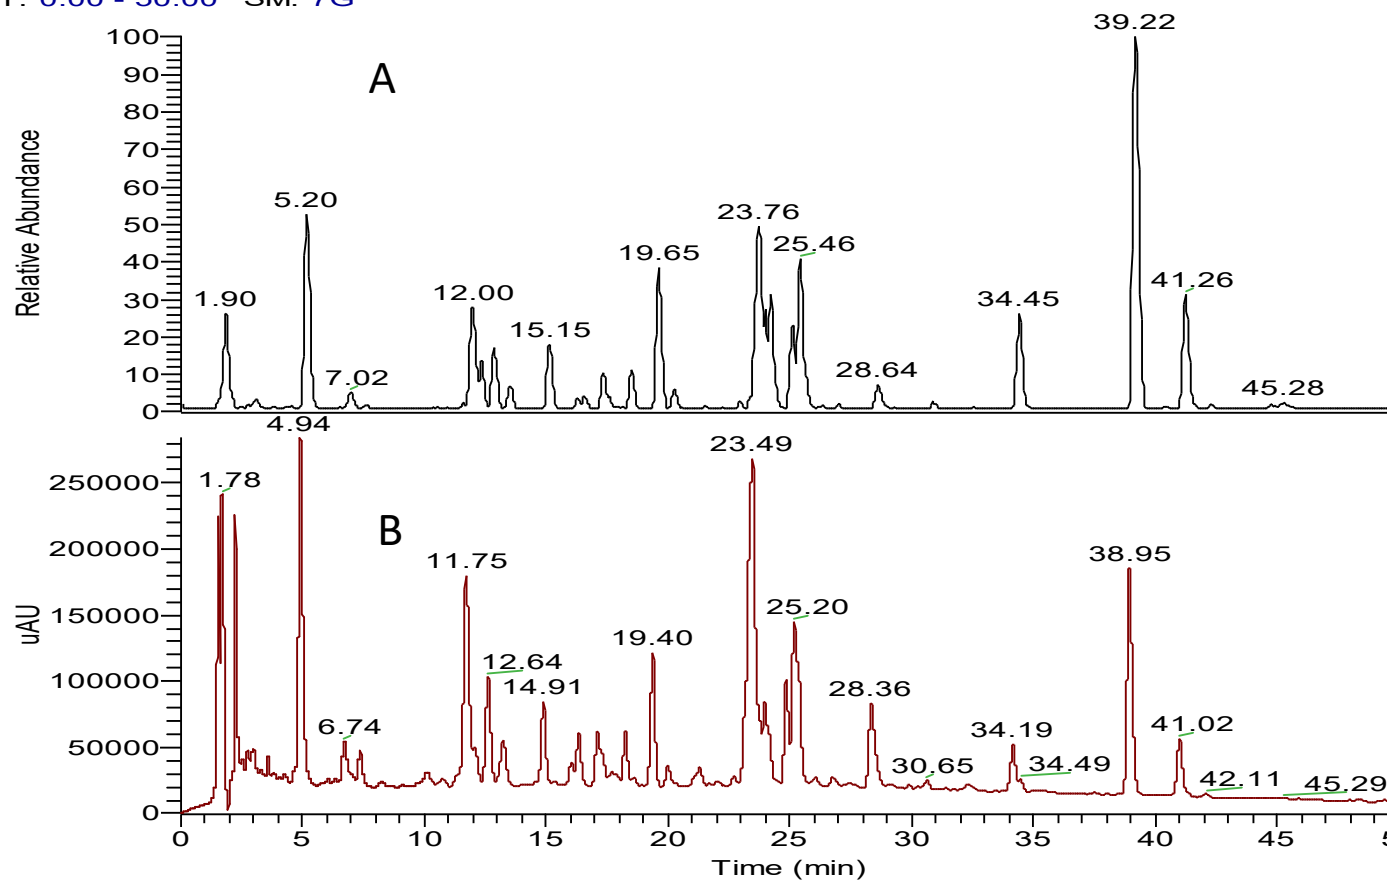

**Figure S13.** HPLC-PDA-MS chromatogram of the MeOH 50% extract of *Matricaria pubescens* flowers. A: MS chromatogram; B: UV chromatogram at 330 nm.



**Table T4.** MS fragmentation and UV-vis absorption data of the compounds detected in the MeOH:H<sub>2</sub>O 50:50 extract of *Matricaria pubescens* flowers.

| Rt    | UV(nm)          | MS-ESI(-)                                                                                                                             | Identification                            |
|-------|-----------------|---------------------------------------------------------------------------------------------------------------------------------------|-------------------------------------------|
| 4.94  | 297, 326        | 191 [quinic acid-H] <sup>-</sup> , 353 [M-H] <sup>-</sup>                                                                             | Chlorogenic acid                          |
| 11.75 | 259, 275, 356   | 317 [A-H] <sup>-</sup> , 479 [M-H] <sup>-</sup>                                                                                       | quercetagenin-3-O-glucoside               |
| 12.64 | 255, 269, 349   | 327 [M-120-H] <sup>-</sup> , 357 [M-90-H] <sup>-</sup> , 447 [M-H] <sup>-</sup>                                                       | Isoorientin (luteolin-6C-glucopyranoside) |
| 13.31 | 252, 269, 340   | 327 [M-120-H] <sup>-</sup> , 357 [M-90-H] <sup>-</sup> , 447 [M-H] <sup>-</sup>                                                       | Orientin (luteolin-8C-glucopyranoside)    |
| 14.91 | 281, 344        | 301 [A-H] <sup>-</sup> , 463 [M-H] <sup>-</sup>                                                                                       | 6-hydroxyluteolin-7-O-glucoside           |
| 17.11 | 278, 323        | 301 [A-H] <sup>-</sup> , 463 [M-H] <sup>-</sup>                                                                                       | 6/8-hydroxyluteolin-4'-O-glucoside        |
| 17.59 | 269, 333        | 269 [A-H] <sup>-</sup> , 311, 341, 431 [M-H] <sup>-</sup>                                                                             | isovitexin                                |
| 18.26 | 259, 276sh, 352 | 331, 493 [M-H] <sup>-</sup>                                                                                                           | patuletin-3-O-glucoside                   |
| 19.40 | 254, 266, 347   | 285 [A-H] <sup>-</sup> , 447 [M-H] <sup>-</sup>                                                                                       | luteolin-7-O-glucoside                    |
| 23.49 | 245, 298, 328   | 179 [caffeic acid-H] <sup>-</sup> , 191 [quinic acid-H] <sup>-</sup> , 353 [M-caffeoyl group-H] <sup>-</sup> , 515 [M-H] <sup>-</sup> | 3,5-O-dicaffeoylquinic acid               |
| 23.77 | 268, 334        | 285 [A-H] <sup>-</sup> , 447 [M-H] <sup>-</sup>                                                                                       | luteolin-4'-O-glucoside                   |

|       |               |                                                 |                                     |
|-------|---------------|-------------------------------------------------|-------------------------------------|
| 23.98 | 267, 333      | 269 [A-H] <sup>-</sup> , 431 [M-H] <sup>-</sup> | apigenin-7-O-glucoside              |
| 24.87 | 267, 336      | 269 [A-H] <sup>-</sup> , 445 [M-H] <sup>-</sup> | apigenin-7-O-glucuronide            |
| 25.20 | 298, 327      | 161, 179, 381, 543 [M-H] <sup>-</sup>           | derivative of caffeic acid          |
| 34.19 | 266, 291, 346 | 285 [M-H] <sup>-</sup>                          | luteolin                            |
| 38.95 | 297, 326      | 543, 705 [M-H] <sup>-</sup>                     | polyamin derivative -not identified |
| 41.02 | 267, 336      | 269 [M-H] <sup>-</sup>                          | apigenin                            |

A: aglycon

RT: 0.00 - 55.00 SM: 7G

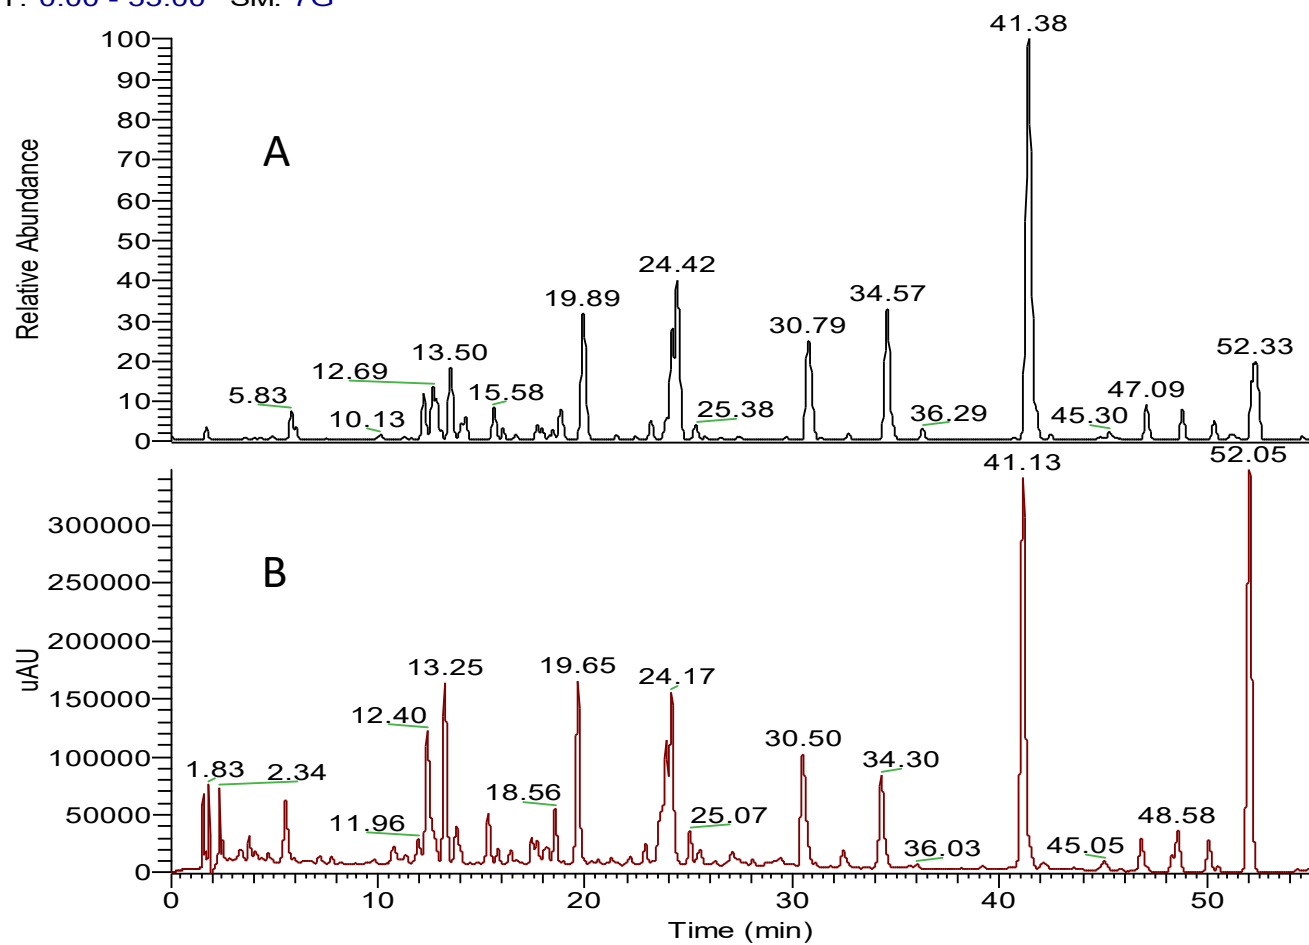

**Figure S14.** HPLC-PDA-MS chromatogram of the Butanol extract of *Matricaria pubescens* flowers. A: MS chromatogram; B: UV chromatogram at 330 nm.

**Table T5.** MS fragmentation and UV-vis absorption data of the compounds detected in the butanol extract of *Matricaria pubescens* flowers.

| Rt    | UV(nm)          | MS-ESI(-)                                                                       | Identification                           |
|-------|-----------------|---------------------------------------------------------------------------------|------------------------------------------|
| 5.60  | 296, 326        | 191 [quinic acid-H] <sup>-</sup> , 353 [M-H] <sup>-</sup>                       | Chlorogenic acid                         |
| 11.96 | 248             | 447                                                                             | Not identified                           |
| 12.40 | 259, 274, 356   | 317 [A-H] <sup>-</sup> , 447, 479 [M-H] <sup>-</sup>                            | quercetagenin-3-O-glucoside              |
| 13.25 | 255, 269, 349   | 327 [M-120-H] <sup>-</sup> , 357 [M-90-H] <sup>-</sup> , 447 [M-H] <sup>-</sup> | Isorientin (luteolin-6C-glucopyranoside) |
| 14.00 | 254, 268, 344   | 327 [M-120-H] <sup>-</sup> , 357 [M-90-H] <sup>-</sup> , 447 [M-H] <sup>-</sup> | Orientin (luteolin-8C-glucopyranoside)   |
| 15.34 | 281, 344        | 301 [A-H] <sup>-</sup> , 463 [M-H] <sup>-</sup>                                 | 6-hydroxyluteolin-7-O-glucoside          |
| 15.78 | 254, 306, 354   | 313.8 [A-H] <sup>-</sup> , 638.9 [M-H] <sup>-</sup>                             | isorhamnetin-3-O-dihexoside              |
| 18.56 | 259, 277, 356   | 331 [A-H] <sup>-</sup> , 493 [M-H] <sup>-</sup>                                 | patuletin-3-O-glucoside                  |
| 19.65 | 255, 267sh, 345 | 285 [A-H] <sup>-</sup> , 447 [M-H] <sup>-</sup>                                 | luteolin-7-O-glucoside                   |
| 22.96 | 253, 266, 348   | 299, 314, 477 [M-H] <sup>-</sup>                                                | isorhamnetin-3-O-hexoside                |
| 24.00 | 268, 338        | 285 [A-H] <sup>-</sup> , 447 [M-H] <sup>-</sup>                                 | luteolin-4'-O-glucoside                  |

|       |               |                                                  |                                                                                             |
|-------|---------------|--------------------------------------------------|---------------------------------------------------------------------------------------------|
| 24.17 | 266, 336      | 268 [M-2H] <sup>-</sup> , 431 [M-H] <sup>-</sup> | apigenin-7-O-glucoside                                                                      |
| 25.07 | 266, 341      | 269 [A-H] <sup>-</sup> , 461 [M-H] <sup>-</sup>  | apigenin-7-O-glucuronide                                                                    |
| 30.50 | 298           | 519, 639                                         | Tri-p-coumaroyl spermine derivative (cis and trans isomer)                                  |
| 34.30 | 253, 266, 348 | 285 [M-H] <sup>-</sup>                           | luteolin                                                                                    |
| 41.13 | 267, 291, 335 | 269 [M-H] <sup>-</sup>                           | apigenin                                                                                    |
| 46.84 | 275           | 545, 665, 785 [M-H] <sup>-</sup>                 | N1(Z)-N5(Z)-N10(Z)-N14(Z)-tetra-p-coumaroyl spermine/thermospermine (cis-isomers)           |
| 48.58 | 290           | 545, 665, 785 [M-H] <sup>-</sup>                 | N1(Z)-N5(Z)-N9(Z)-N14(Z)- tetra-p-coumaroyl spermine/thermospermine (cis and trans-isomers) |
| 50.10 | 292, 308      | 785 [M-H] <sup>-</sup>                           | N1(E)-N5(E)-N10(E)-N14(E)- tetra-p-coumaroyl spermine (trans-isomer)                        |
| 52.05 | 297, 308      | 665, 785 [M-H] <sup>-</sup>                      | N1(E)-N5(E)-N9(E)-N14(E)- tetra-p-coumaroyl thermospermine (trans-isomer)                   |

A: aglycon

RT: 0.00 - 50.00 SM: 7G

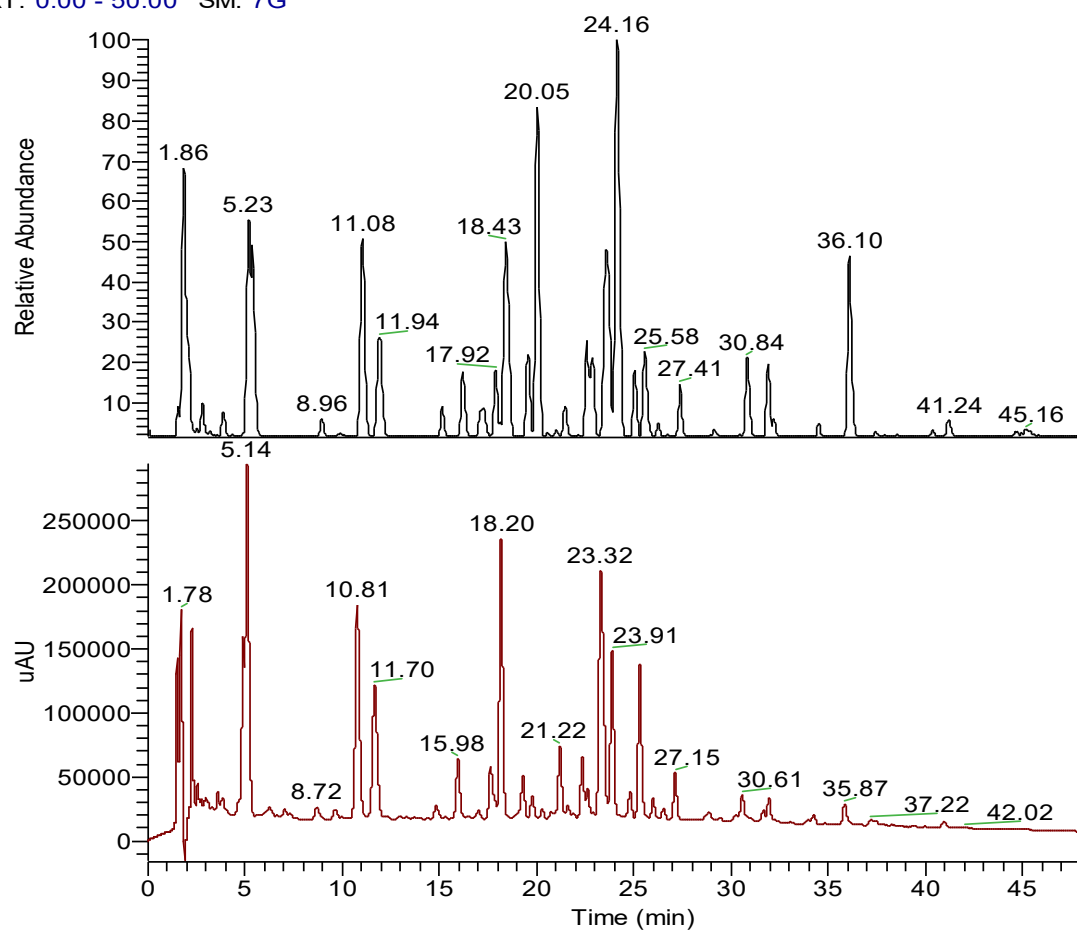

**Figure S15.** HPLC-PDA-MS chromatogram of the MeOH50% extract of *Matricaria recutita* flowers. A: MS chromatogram; B: UV chromatogram at 330 nm.

**Table T6.** MS fragmentation and UV-vis absorption data of the compounds detected in the MeOH:H<sub>2</sub>O extract of *Matricaria recutita* flowers.

| Rt    | UV                 | MS-ESI(-)                                                                                                                                       | Identification                                                |
|-------|--------------------|-------------------------------------------------------------------------------------------------------------------------------------------------|---------------------------------------------------------------|
| 4.94  | 297, 326           | 191 [quinic acid-H] <sup>-</sup> , 353 [M-H] <sup>-</sup>                                                                                       | Chlorogenic acid                                              |
| 5.14  | 281, 301           | 134, 149, 193, 355 [M-H] <sup>-</sup> , 711 [2M-H] <sup>-</sup>                                                                                 | cis-2-hydroxy-4-methoxycinnamic-oxo-2-O-β-D-glucopyranoside   |
| 10.81 | 295, 318           | 135, 149, 193, 355 [M-H] <sup>-</sup> , 711 [2M-H] <sup>-</sup>                                                                                 | trans-2-hydroxy-4-methoxycinnamic-oxo-2-O-β-D-glucopyranoside |
| 11.70 | 258, 273, 345      | 317 [A-H] <sup>-</sup> , 479 [M-H] <sup>-</sup>                                                                                                 | quercetagenin-3-O-glucoside                                   |
| 15.98 | 255, 370           | 301 [A-H] <sup>-</sup> , 463 [M-H] <sup>-</sup>                                                                                                 | quercetin-7-O-hexoside                                        |
| 17.68 | 258, 369           | 331 [A-H] <sup>-</sup> , 493 [M-H] <sup>-</sup>                                                                                                 | patuletin-7-O-glucoside                                       |
| 18.20 | 259, 356,<br>sh382 | 331 [A-H] <sup>-</sup> , 493 [M-H] <sup>-</sup>                                                                                                 | patuletin-3-O-glucoside                                       |
| 19.35 | 256, 267, 346      | 285 [A-H] <sup>-</sup> , 447 [M-H] <sup>-</sup>                                                                                                 | luteolin-7-O-glucoside                                        |
| 19.80 | -                  | 711                                                                                                                                             | Not identified                                                |
| 21.22 | 299, 325           | 173, 179 [caffeic acid-H] <sup>-</sup> , 191 [quinic acid-H] <sup>-</sup> , 335, 353 [M-caffeoyl group-H] <sup>-</sup> , 515 [M-H] <sup>-</sup> | 3,4-O-dicaffeoylquinic acid                                   |
| 22.61 | 255, 370           | 315 [A-H] <sup>-</sup> , 477 [M-H] <sup>-</sup>                                                                                                 | isorhamnetin-7-O-hexoside                                     |
| 22.87 | 254, 348           | 315 [A-H] <sup>-</sup> , 477 [M-H] <sup>-</sup>                                                                                                 | isorhamnetin-3-O-hexoside                                     |
| 23.32 | 245, 300, 327      | 179 [caffeic acid-H] <sup>-</sup> , 191 [quinic acid-H] <sup>-</sup> , 353 [M-caffeoyl-H] <sup>-</sup> , 515 [M-H] <sup>-</sup>                 | 3,5-O-dicaffeoylquinic acid                                   |

|       |               |                                                                                                                                      |                                                      |
|-------|---------------|--------------------------------------------------------------------------------------------------------------------------------------|------------------------------------------------------|
| 23.91 | 267, 336      | 269 [A-H] <sup>-</sup> , 431 [M-H] <sup>-</sup>                                                                                      | apigenin-7-O-glucoside                               |
| 24.81 | 253, 268, 345 | 461 [M-H] <sup>-</sup>                                                                                                               | chrysoeriol-7-O-glucoside                            |
| 25.31 | 245, 300, 327 | 173, 179 [caffeic acid-H] <sup>-</sup> , 191 [quinic acid-H] <sup>-</sup> , 353 [M-caffeoyl-H] <sup>-</sup> , 515 [M-H] <sup>-</sup> | 4,5-O-dicaffeoylquinic acid                          |
| 27.15 | 296, 321      | 149, 161, 193, 323, 517, 539 [M-H] <sup>-</sup>                                                                                      | Dicaffeoylquinic acid derivative                     |
| 30.61 | 267, 329      | 269 [A-H] <sup>-</sup> , 473 [M-H] <sup>-</sup>                                                                                      | apigenin-4'-acetyl-hexoside (tentatively identified) |
| 31.70 | 267, 336      | 269 [A-H] <sup>-</sup> , 473 [M-H] <sup>-</sup>                                                                                      | apigenin-7-acetyl-hexoside                           |
| 35.87 | 267, 335      | 269 [A-H] <sup>-</sup> , 473 [M-H] <sup>-</sup>                                                                                      | apigenin-7-acetyl hexoside isomer                    |

A: aglycon



## **In vitro protective activity on BALbC 3T3 mouse skin fibroblasts**

The culture medium was consisted of Fetal Bovine Serum (10%) and antibiotic-antimycotic (1%) and DMEM with 4mM L-glutamine. The incorporation of chamomile extracts was performed in all phases of the experiment, both in the culture medium (DMEM) and in the irradiation medium or buffer solution (PBS). Six concentrations of the chamomile extracts were tested, covering a large range, e.g. 0.1 µg/mL, 1µg/mL, 10µg/mL, 50µg/mL, 100µg/mL, 200µg/mL. Irradiation Conditions: Doses of 6 J/cm<sup>2</sup> and 7 J/cm<sup>2</sup> (as measured in the UVA range) were determined to be cytotoxic to Balb/c 3T3 cells and sufficiently potent to reveal anti-inflammatory and cytoprotective properties of the extracts. The irradiance was adjusted to achieve 6 J/cm<sup>2</sup> within a time period of 60min and to achieve 7 J/cm<sup>2</sup> within a time period of 70min.

### **Test Procedure**

#### 1st day

A cell suspension (BALbC 3T3 mouse skin fibroblasts, ATCC) was prepared in culture medium. Using a multichannel pipette, an appropriate volume of cell suspension was dispensed into the appropriate number of wells in two 96 well plate. The number of cells per well was equal to 10<sup>4</sup>. The cells are incubated for 24 h (5% CO<sub>2</sub>, 37 °C, > 90% humidity) so that cells form a half-confluent monolayer. This incubation period ensured cell recovery, adherence and progression to exponential growth phase. The wells were examined under a phase contrast microscope to ensure the condition of exponential cell growth into all plate wells-

#### 2nd day

After 24 h incubation, the culture medium was aspirated from the cells. 100 µL of treatment medium (DMEM, 5% FBS) was added per well. The six concentrations of each extract (*Matricaria pubescens* methanolic and hydromethanolic extracts & *Matricaria recutita* methanolic and hydromethanolic extracts) or control were added in three different wells for each concentration (3 replicates). Cells were again incubated for 24h (5 % CO<sub>2</sub>, 37 °C, > 90 % humidity).

#### 3rd day

After 24 h incubation, the culture medium was aspirated from the cells. The six concentrations of each extract (*Matricaria pubescens* methanolic and hydromethanolic extracts & *Matricaria recutita* methanolic and hydromethanolic extracts) were prepared by diluting the stock solution into phosphate buffered salt solutions (pH= 7.4), free from protein components and light absorbing components (e.g., pH-indicator colors and vitamins) to avoid interference during irradiation. 100

µL of the buffer containing the appropriate concentration of the extracts were added per well, as well as the solvent (blank). Cells were incubated in the dark for 60 minutes. To perform the +UV exposure, the cells were irradiated at room temperature for approximately 60 minutes through the lid of the 96-well plate to achieve the selected radiation doses. The test solution was decanted, and the cells carefully washed twice with 150 µL of the buffered solution used for incubation, but not containing the test material. The buffer was replaced with culture medium and incubated overnight (18-22 h). The Neutral Red-(NR) solution was prepared and incubated at 37°C overnight.

#### 4th day

After 24 h treatment, plates were examined under a phase contrast microscope to identify systematic cell seeding errors and growth characteristics of control and treated cells. Changes in morphology of the cells due to cytotoxic effects of the test extracts were recorded. The cells were washed with 150 µL PBS. The washing solution was then removed and 100 µL of ~~and~~ NR solution, after being centrifuged at 600g for 10 min (to remove NR crystals), was ~~ere~~ added. Cells were incubated at 37 °C in a humidified atmosphere of 5 % CO<sub>2</sub> for 3h. After incubation, the NR solution was removed, and cells were washed with 150 µL PBS. 150 µL NR desorb solution was added to all wells, including blanks. The microtitre plate was shaken at 300rpm on a minishaker for 10 min until NR was extracted from the cells and formed a homogeneous solution. The absorption of this solution was measured at 540 nm.
